# Supplementary material
Source: PubMed Central journal article supplement (PMC4868598)
Supplement: NIHMS785300-supplement-T1.pdf [file NIHMS785300-supplement-T1.pdf]

## Supplementary Table 1

| Clinical characteristics                                                     | All patients (n=100) |
|------------------------------------------------------------------------------|----------------------|
| <b>Age</b>                                                                   |                      |
| Median - years                                                               | 63                   |
| Range - years                                                                | 37 to 88             |
| <b>Sex – n</b>                                                               |                      |
| Female                                                                       | 38                   |
| Male                                                                         | 62                   |
| <b>Site of disease for molecular analysis on FFPE – n</b>                    |                      |
| Primary tumor                                                                | 62                   |
| Metastatic site - Liver                                                      | 31                   |
| Metastatic site - Lung                                                       | 1                    |
| Metastatic site - Nodes                                                      | 2                    |
| Metastatic site - Peritoneum                                                 | 3                    |
| Metastatic site - Bone                                                       | 1                    |
| <b>Gene mutation in FFPE – n</b>                                             |                      |
| KRAS exon 2                                                                  | 48                   |
| KRAS exon 3                                                                  | 1                    |
| KRAS exon 4                                                                  | 2                    |
| BRAF V600E                                                                   | 8                    |
| NRAS exon 2                                                                  | 2                    |
| NRAS exon 3                                                                  | 3                    |
| <b>Intact primary at the moment of liquid biopsy – n</b>                     |                      |
| YES                                                                          | 48                   |
| NO                                                                           | 49                   |
| <b>Site of disease at the moment of liquid biopsy – n</b>                    |                      |
| Liver                                                                        | 83                   |
| Lung                                                                         | 45                   |
| Peritoneum                                                                   | 18                   |
| Bone                                                                         | 4                    |
| Other                                                                        | 21                   |
| <b>Time span between molecular analysis on FFPE and liquid biopsy – days</b> |                      |
| Median                                                                       | 43                   |
| Range                                                                        | -561 to 2600         |
